# Supplementary material
Source: Springer Nature journal article supplement (https://www.springermedizin.de/resource/supplementary/13026_2008_30_MOESM5_ESM.pdf/9644504)
Supplement: MOESM5 [file 9644504]

**MOTION TESTS**

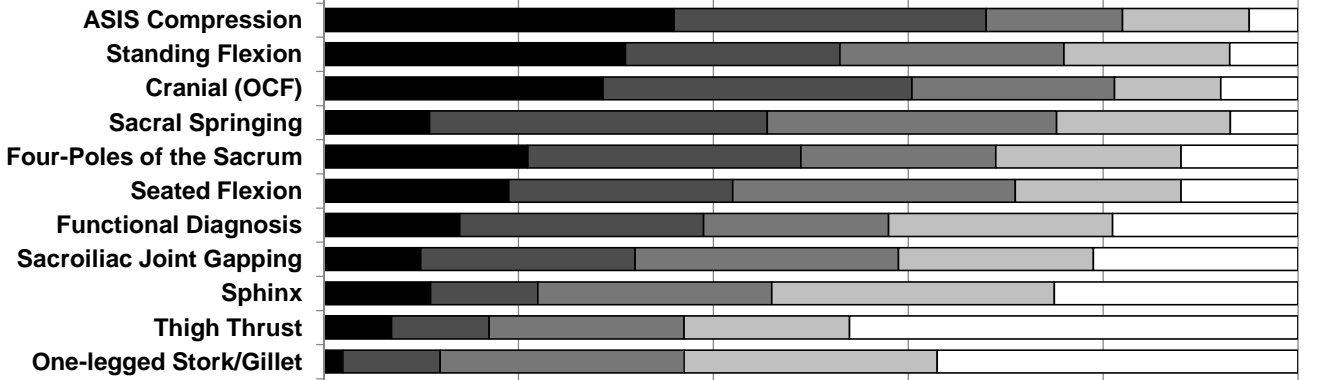

**PROVOCATION TESTS**

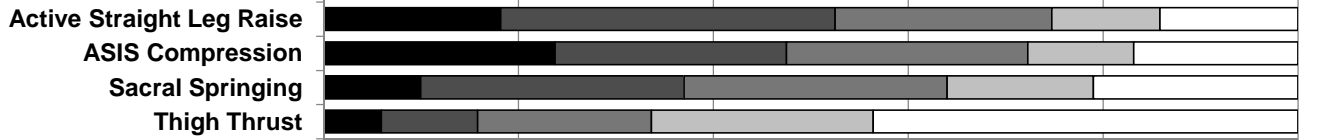

0% 20% 40% 60% 80% 100%

Percent of Respondents

Always Frequently Sometimes Rarely Never
